# Supplementary material
Source: publisher site journal article supplement (https://www.dovepress.com/article/266123)
Supplement: Supplementary file 1 [file get_supplementary_file.php]

| **COMPLETING THIS SURVEY IS VOLUNTARY.** Your response helps us determine how to plan future workshops. |
| --- |

**1. Did you have any hands-on experience with direct ophthalmoscopy prior to this teaching session?**

Yes No

**2. Did you have any hands-on experience with smartphone fundoscopy prior to this teaching session?**

Yes No

**3. Please check if you identified any of the following with smartphone funduscopy today:**

[ ] Optic nerve

[ ] Vertical cup-to-disc ratio; please provide your estimate _________

[ ] Fovea and macula

[ ] The arcade blood vessels

**4. Please check if you identified any of the following with direct ophthalmoscopy today:**

[ ] Optic nerve

[ ] Vertical cup-to-disc ratio; please provide your estimate _________

[ ] Fovea and macula

[ ] The arcade blood vessels

**Please identify the level of detail you were able to see using the different imaging modalities**

**Direct Ophthalmoscope**

**5A. *Optic*** ***nerve***:

1 ---------------- 2 ----------------- 3 ----------------- 4 ----------------- 5

Poor resolution Perfect resolution

(barely any details visible) (all details are sharp)

**5B. *How many attempts did it take you to identify optic nerve?***

1-2 3-5 >5 I did not find it

**6. *Fovea*** and ***macula***:

1 ---------------- 2 ----------------- 3 ----------------- 4 ----------------- 5

Poor resolution Perfect resolution

(barely any details visible) (all details are sharp)

**Smartphone Funduscopy**

**7A. *Optic*** ***nerve***:

1 ---------------- 2 ----------------- 3 ----------------- 4 ----------------- 5

Poor resolution Perfect resolution

(barely any details visible) (all details are sharp)

**7B. *How many attempts did it take you to identify optic nerve?***

1-2 3-5 >5 I did not find it

**8. *Fovea*** and ***macula***:

1 ---------------- 2 ----------------- 3 ----------------- 4 ----------------- 5

Poor resolution Perfect resolution

(barely any details visible) (all details are sharp)

| **Please answer each following question based on your experience with the individual technique.** |
| --- |

**9. How likely are you to recommend learning the smartphone funduscopy exam to other medical students?**

1 ---------------- 2 ----------------- 3 ----------------- 4 ----------------- 5

Not likely Probable Very likely

**10. How likely are you to recommend learning the direct ophthalmoscopy exam to other medical students?**

1 ---------------- 2 ----------------- 3 ----------------- 4 ----------------- 5

Not likely Probable Very likely

**11. I believe learning the smartphone funduscopy exam is a useful part of my MS2 education.**

1 ---------------- 2 ----------------- 3 ----------------- 4 ----------------- 5

Strongly Disagree Neutral Strongly Agree

**12. I believe learning the direct ophthalmoscopy exam is a useful part of my MS2 education.**

1 ---------------- 2 ----------------- 3 ----------------- 4 ----------------- 5

Strongly Disagree Neutral Strongly Agree

**13. After this practicum, I feel confident in using smartphone funduscopy to examine a patient.**

1 ---------------- 2 ----------------- 3 ----------------- 4 ----------------- 5

Strongly Disagree Neutral Strongly Agree

**14. After this practicum, I feel confident in using direct ophthalmoscopy to examine a patient.**

1 ---------------- 2 ----------------- 3 ----------------- 4 ----------------- 5

Strongly Disagree Neutral Strongly Agree

**15. How likely are you to use smartphone funduscopy into your future practice?**

1 ---------------- 2 ----------------- 3 ----------------- 4 ----------------- 5 6

Not likely Probable Very likely Unsure

**16. How likely are you to use direct ophthalmoscopy into your future practice?**

1 ---------------- 2 ----------------- 3 ----------------- 4 ----------------- 5 6

Not likely Probable Very likely Unsure

**17. Overall, how would rate smartphone funduscopy as a teaching tool for this practicum ophthalmic exam?**

1 --------------------------- 2 --------------------------- 3 --------------------------- 4 --------------------------- 5

Useless Somewhat Useful Very Useful

(Didn’t learn anything) (Aids my understanding of a fundus exam)

**18. Overall, how would rate direct ophthalmoscopy as a teaching tool for this practicum ophthalmic exam?**

1 --------------------------- 2 --------------------------- 3 --------------------------- 4 --------------------------- 5

Useless Somewhat Useful Very Useful

(Didn’t learn anything) (Aids my understanding of a fundus exam)

**19. If you had to examine a patient’s optic nerve tomorrow, which technique would you prefer to use? (Check One)**

Smartphone Fundoscopy

Direct Ophthalmocopy

No preference, I am equally comfortable with both

**20. What smartphone did you use during the smartphone funduscopy portion of this session?**

Apple iPhone 5 6 7 8 X

Samsung Galaxy S6 S7 S8

Other: ______________________

**21. What mobile app did you use during the smartphone funduscopy portion of this session?**

My phone’s camera app

ProCamera

FiLMiC Pro

Other __________________________________________

| **Role: as person being examined** |
| --- |

**22A. Please rate your comfort level when someone else performed the smartphone funduscopy exam on you:**

1 ---------------- 2 ----------------- 3 ----------------- 4 ----------------- 5

Uncomfortable Acceptable

(Could not tolerate complete exam) (Brightness was easy to adapt to)

**22B. Did scotch tape over the light source improve comfort level?**

Yes

No

**23. Please rate your comfort level when someone else performed the direct ophthalmoscopy exam on you:**

1 ---------------- 2 ----------------- 3 ----------------- 4 ----------------- 5

Uncomfortable Acceptable

(Could not tolerate complete exam) (Brightness was easy to adapt to)

**24. Please list the top 3 specialties you are currently interested in:**

1. ___________________________________
2. ___________________________________
3. ___________________________________

**25. Are there any other suggestions you have to improve the workshop for subsequent years?**
